# Supplementary material
Source: bioRxiv or medRxiv preprint supplement (https://medrxiv.org/highwire/filestream/94295/field_highwire_adjunct_files/0/2020.06.15.20131987-1.pdf)
Supplement: Supplementary file [file 2020.06.15.20131987-1.pdf]

## Supplemental information

**Table S1. Alleles frequency information and data of additional countries analyzed considering the number of COVID-19 cases.**

| Country                                 |                 | Peru    | Portugal | Romania | Pakistan |
|-----------------------------------------|-----------------|---------|----------|---------|----------|
| <i>cases</i>                            |                 | 115.754 | 30.471   | 17.857  | 221.896  |
| <i>death</i>                            |                 | 3.373   | 1.302    | 1.176   | 4.551    |
| <i>recovered</i>                        |                 | 47.915  | 7.705    | 11.187  |          |
| <i>active cases</i>                     |                 | 64.466  | 21.464   | 5.494   | 103.722  |
| <i>closed cases</i> <sup>A</sup>        |                 | 51.288  | 9.007    | 12.363  |          |
| <i>death:cases</i> <sup>B</sup>         |                 | 34.85   | 23.73    | 15.18   | 48.75    |
| <i>death: closed cases</i> <sup>B</sup> |                 | 15.20   | 6.92     | 10.51   | 25.97    |
| <i>Death: 1 million people</i>          |                 | 332     | 160      | 94      | 22       |
| Alleles frequency <sup>C</sup>          | <i>HLA-B*07</i> | 0.0240  | 0.0612   | 0.0505  | 0.0364   |
|                                         | <i>HLA-B*44</i> | 0.0428  | 0.1476   | 0.0803  | 0.0381   |
|                                         | <i>DRB1*03</i>  | 0.0298  | 0.1110   | 0.1111  | 0.2215   |
|                                         | <i>DRB1*04</i>  | 0.1743  | 0.1346   | 0.0896  | 0.0368   |
| Population size reported <sup>D</sup>   | <i>HLA-B*07</i> | 168     | 64.591   | 8.753   | 623      |
|                                         | <i>HLA-B*44</i> | 251     | 64.764   | 8.753   | 623      |
|                                         | <i>DRB1*03</i>  | 422     | 64.545   | 8.405   | 623      |
|                                         | <i>DRB1*04</i>  | 212     | 64.545   | 8.405   | 623      |

The data about reported cases and deaths was recovered from COVID-19 Dashboard by the Center for Systems Science and Engineering (CSSE) at Johns Hopkins University (Dong et al., 2020)- on July 03, 2020.

<sup>A</sup> Closed cases number was calculated excluding the active ones from total cases.

<sup>B</sup> Death per case ratios of each country are expressed as 1: X (one death in X cases) and the X values were specified in the table.

<sup>C</sup> The allele's frequency for each HLA was obtained as a weighted average (considering the sample size) of all the populations reported in *the allele frequency net database* (<http://www.allelefreqencies.net/>) for each country.

<sup>D</sup> Population size reported is the sum of the sample sizes included in the present study.

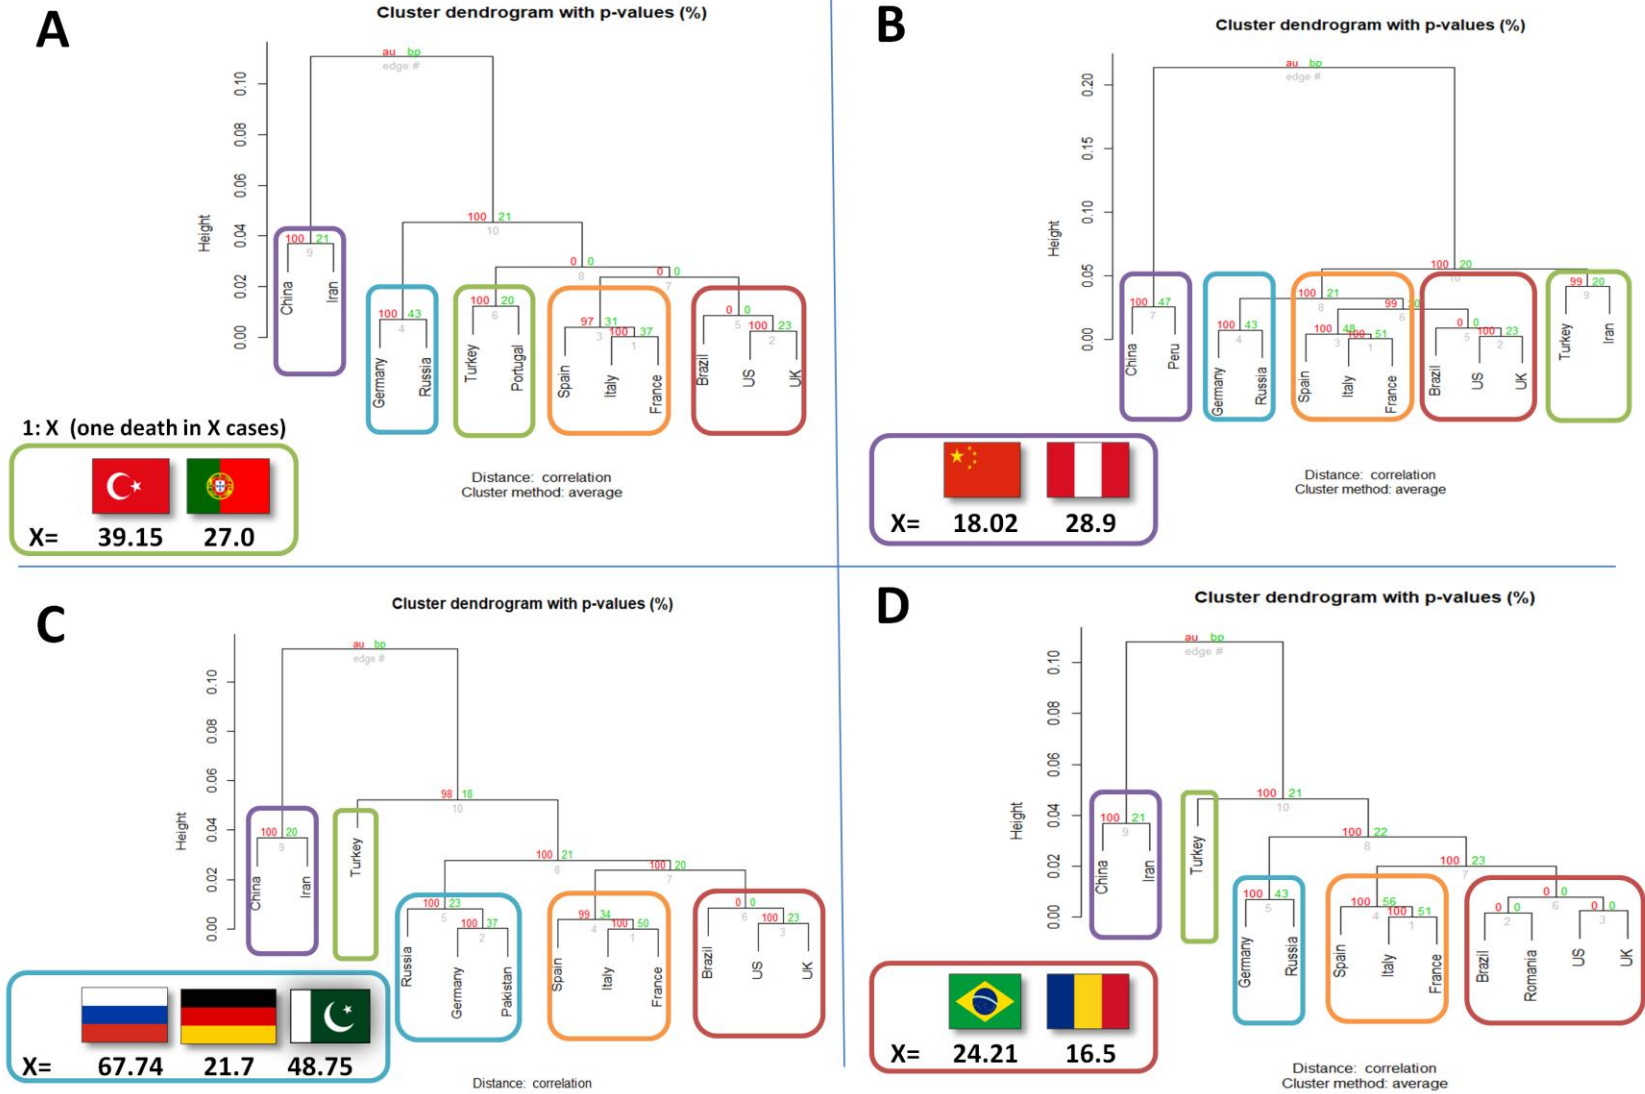

Figure S1.

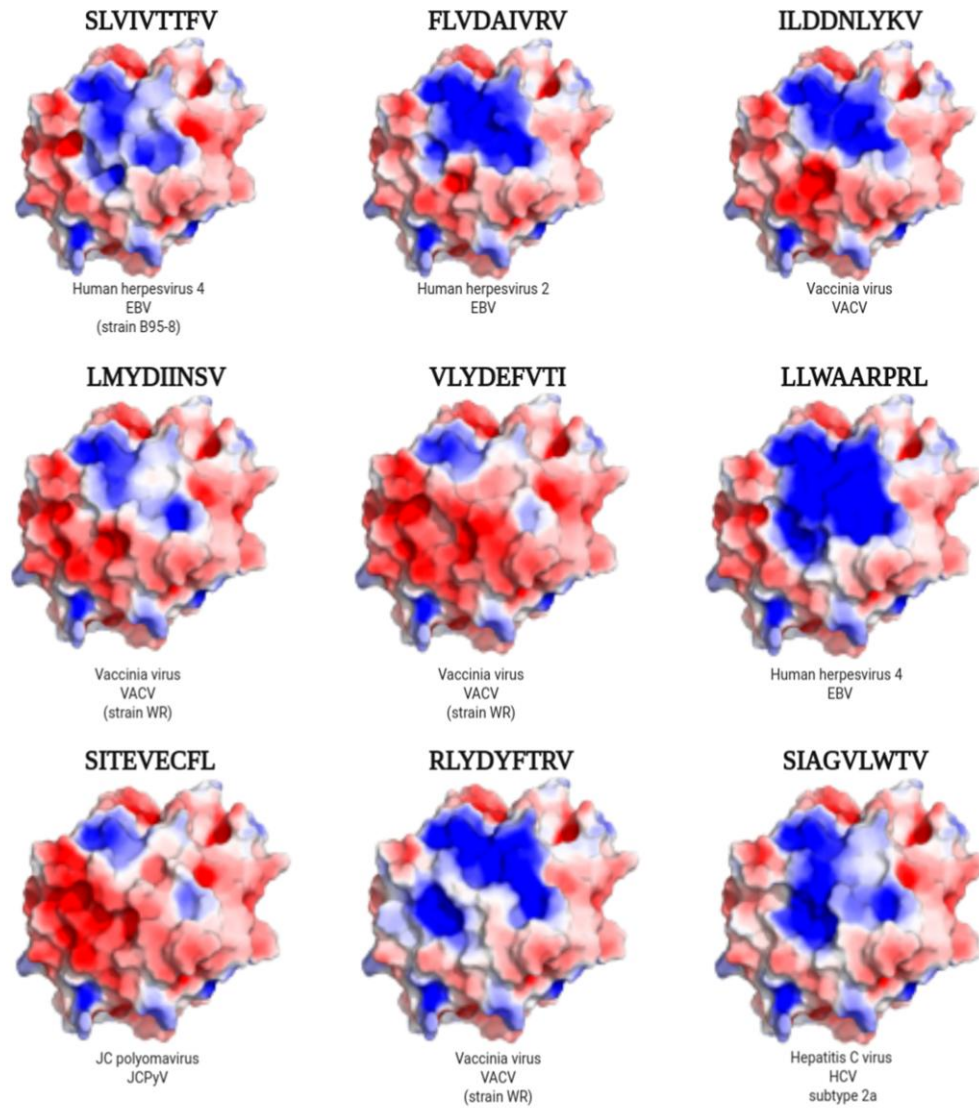

**Figure S2.**

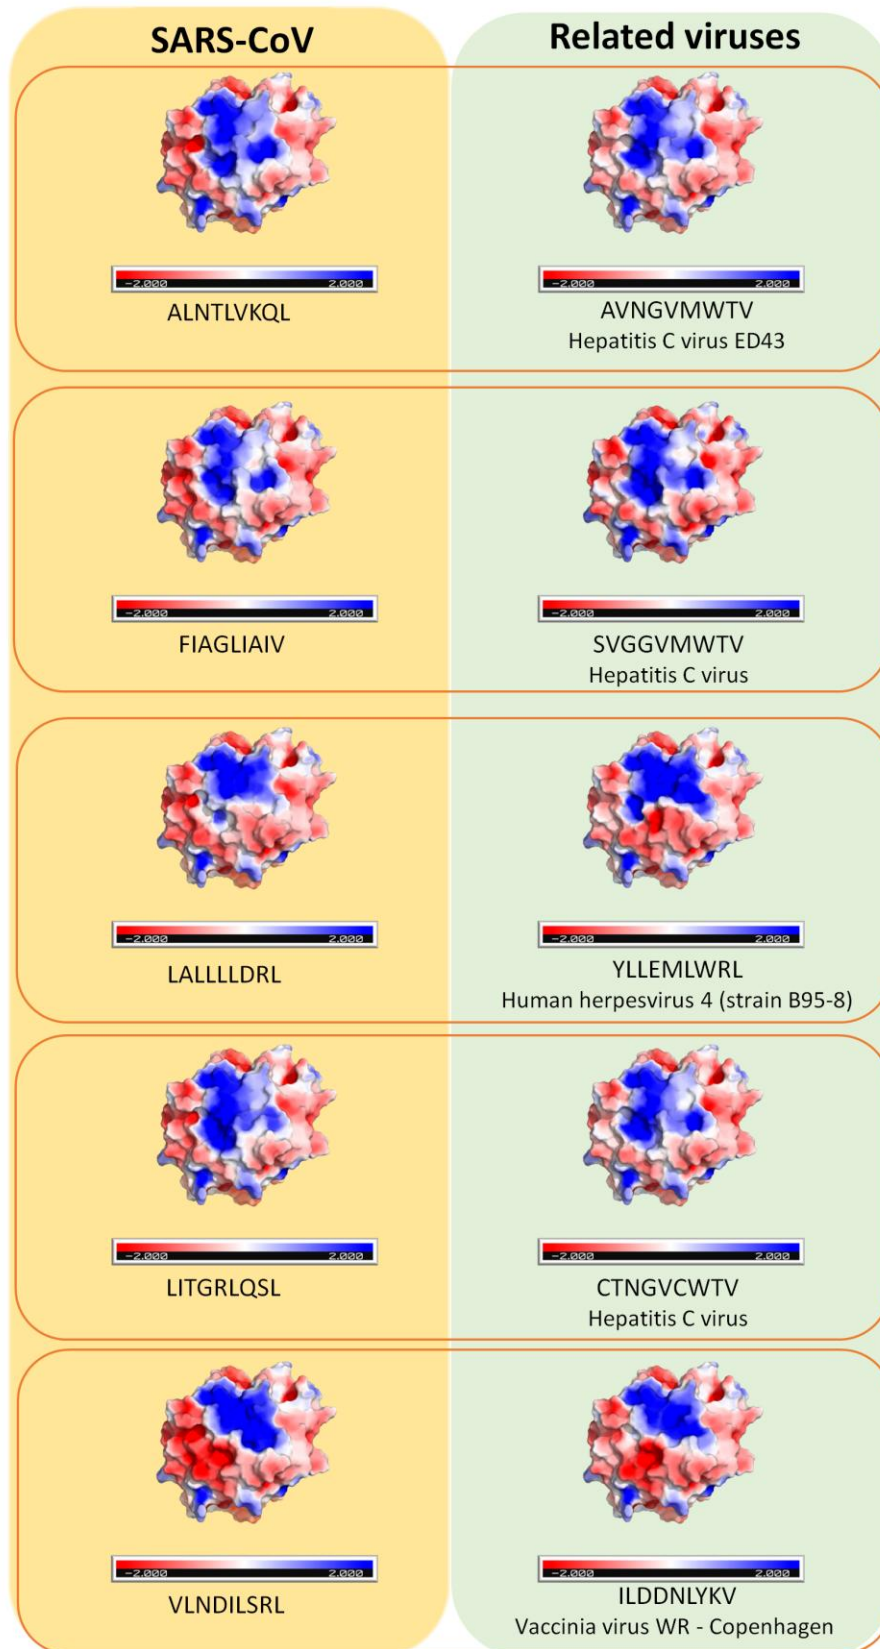

Figure S3.

## Step 1: Generating Data

The alleles frequencies data regarding countries' populations were obtained at <http://www.allelefrequencies.net/>.

| Line | Allele | Population                      | % of individuals that have the allele | Allele Frequency (in decimals) | Sample Size |
|------|--------|---------------------------------|---------------------------------------|--------------------------------|-------------|
| 1    | B*07   | Brazil Pernambuco Mixed         |                                       | 0.0990                         | 101         |
| 2    | B*07   | Brazil Parana Afro Brazilian    | 18.2                                  | 0.0910                         | 77          |
| 3    | B*07   | Brazil REDOME Santa Catarina    |                                       | 0.0847                         | 106,673     |
| 4    | B*07   | Brazil Parana Mulatto           | 16.1                                  | 0.0810                         | 186         |
| 5    | B*07   | Brazil REDOME Rio Grande do Sul |                                       | 0.0795                         | 241,329     |
| 6    | B*07   | Brazil Rio Grande do Sul Mixed  |                                       | 0.0780                         | 324         |
| 7    | B*07   | Brazil REDOME Sergipe           |                                       | 0.0763                         | 7,321       |
| 8    | B*07   | Brazil REDOME Paraiba           |                                       | 0.0740                         | 43,868      |
| 9    | B*07   | Brazil Sao Paulo Mixed          | 14.0                                  | 0.0730                         | 239         |
| 10   | B*07   | Brazil REDOME Parana            |                                       | 0.0723                         | 341,639     |

The weighted average (WA<sup>1</sup>) of each country takes into account every population allele frequency and sample size.

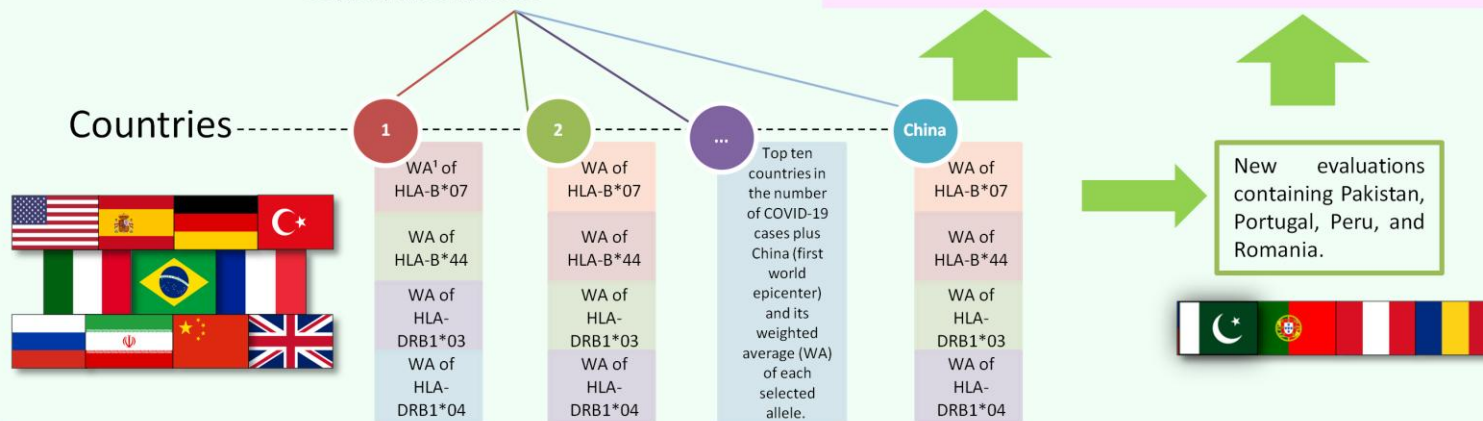

## Step 2: Analysing Data

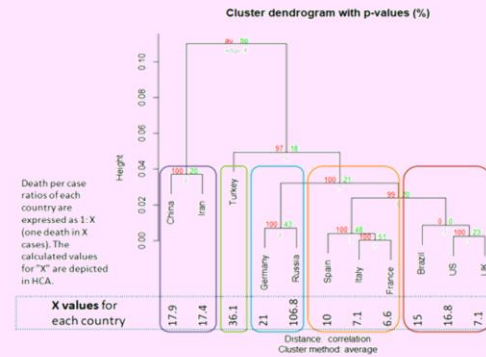

Hierarchical Clustering Analysis (HCA) considering the countries alleles weighted average frequencies of the top ten countries with the highest number of COVID-19 cases and the first world epicenter. The supplementary analysis includes Chile, Portugal, Peru, and Romania in distinct HCAs. The HCAs were made in the R-Studio platform, using pvclust package.

Figure S4.
